# Supplementary material for: A single source precursor for low temperature processing of nanocrystalline MgAl2O4 spinel: synthesis and characterization of [MgAl2(μ3-O)(μ2-OiPr)4(OiPr)2]4
Source: Royal Society of Chemistry journal article supplement (doi:10.1039/c0dt00983k), 2010-01-01
Supplement: c0dt00983k.pdf [file c0dt00983k.pdf]

## Electronic Supporting Information (ESI)

### A Single Source Precursor for Low Temperature Processing of Nanocrystalline $\text{MgAl}_2\text{O}_4$ Spinel: Synthesis and Characterization of $[\text{MgAl}_2(\mu_3\text{-O})(\mu_2\text{-O}^i\text{Pr})_4(\text{O}^i\text{Pr})_2]_4$

Gholamhossein Mohammadnezhad, Mostafa M. Amini\*, Hamid Reza Khavasi

*Department of Chemistry, Shahid Beheshti University, G.C., Tehran 1983963113, Iran*

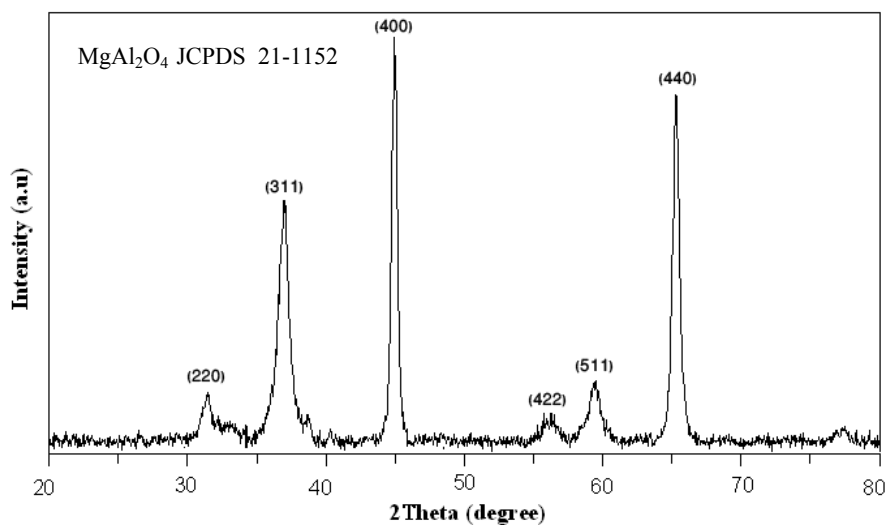

**Figure S1.** X-ray powder diffraction pattern of  $\text{MgAl}_2\text{O}_4$  obtained from hydrolysis of **II**.

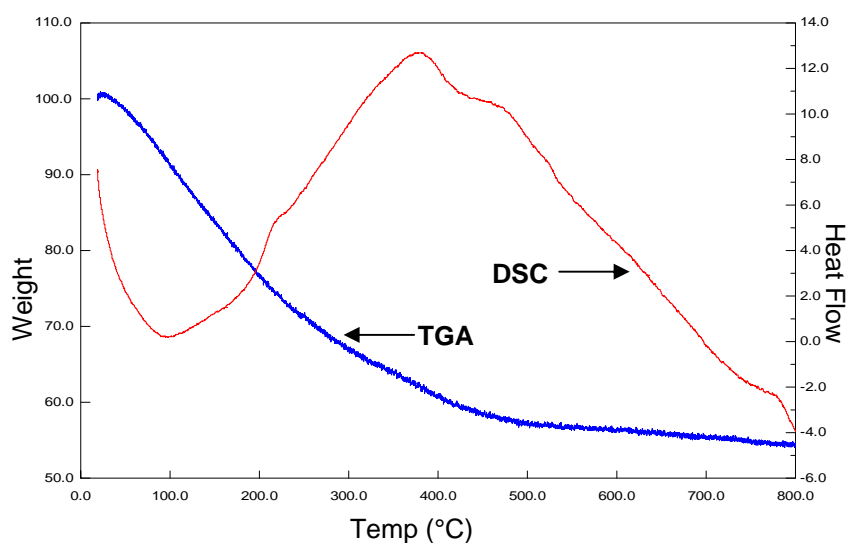

**Figure S2.** TGA- DSC profile of the gel obtained from sol-gel processing of **II**.

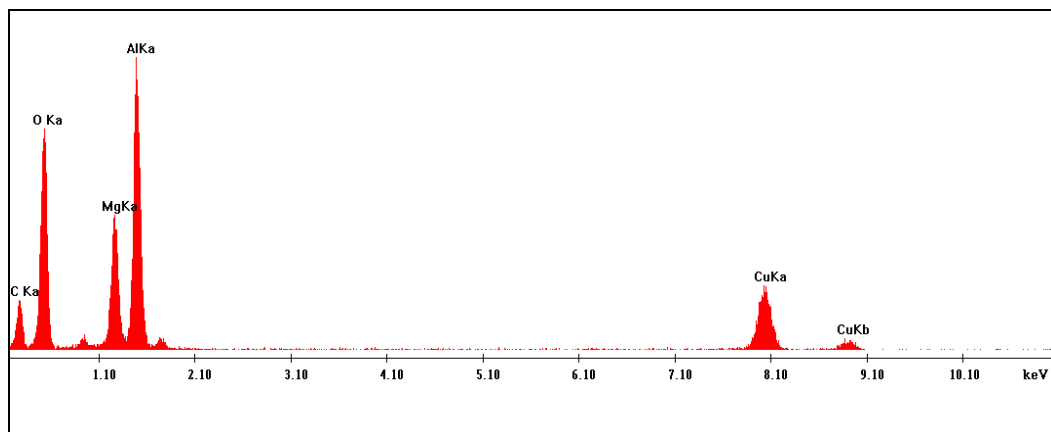

**Figure S3.** Energy dispersive X-ray spectrum of MgAl<sub>2</sub>O<sub>4</sub>.

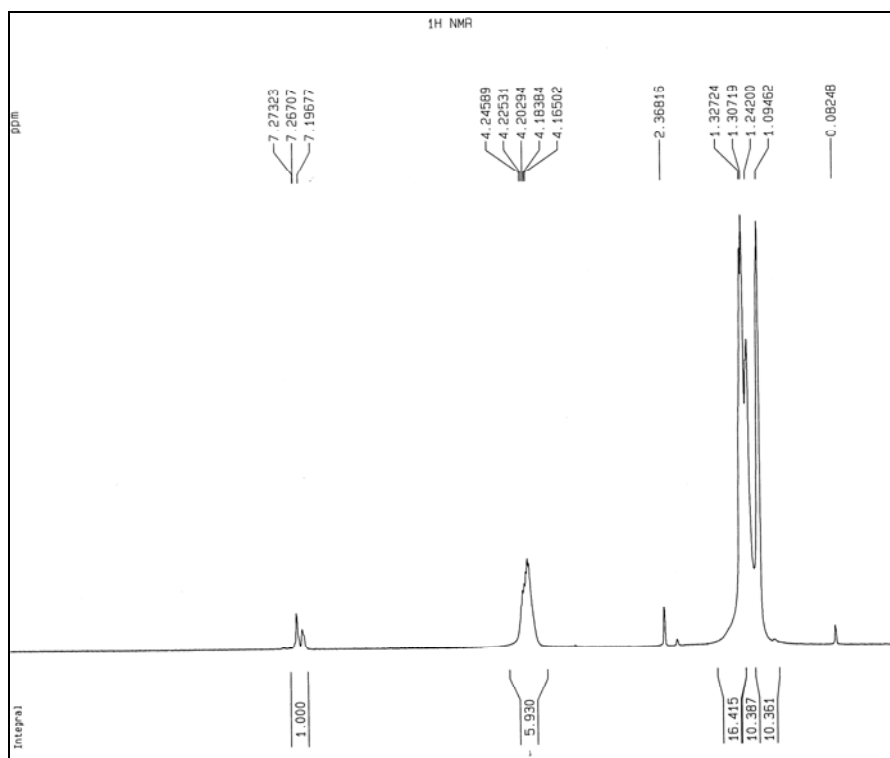

**Figure S4.** <sup>1</sup>H NMR spectrum of **II** in CDCl<sub>3</sub>.

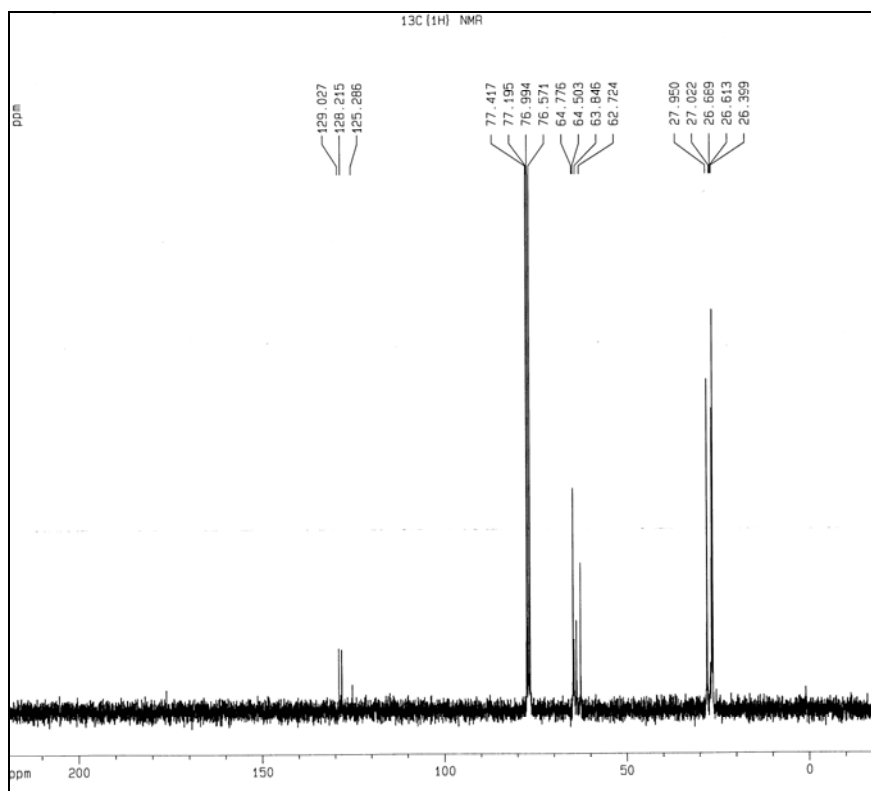

**Figure S5.** <sup>13</sup>CNMR spectrum of **II** in CDCl<sub>3</sub>.

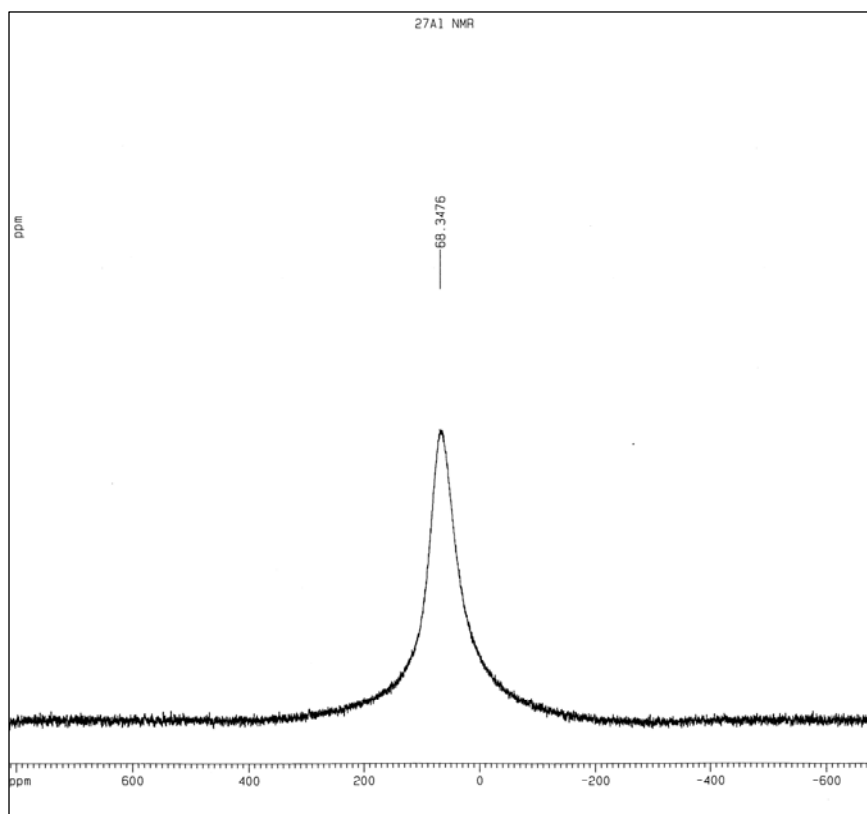

**Figure S6.** <sup>27</sup>AlNMR spectrum of **II** in CDCl<sub>3</sub>.

Table S1. Crystal data for **II**

| Complex                                                          | <b>II</b>                                                                                                        |
|------------------------------------------------------------------|------------------------------------------------------------------------------------------------------------------|
| Empirical formula                                                | C <sub>72</sub> H <sub>168</sub> Al <sub>8</sub> Mg <sub>4</sub> O <sub>28</sub> , C <sub>7</sub> H <sub>8</sub> |
| Formula weight                                                   | 1887.29                                                                                                          |
| Temperature (K)                                                  | 120(2)                                                                                                           |
| Wavelength (Å)                                                   | 0.71073                                                                                                          |
| Crystal system                                                   | Orthorhombic                                                                                                     |
| Space group                                                      | <i>Pnn2</i>                                                                                                      |
| <i>a</i> (Å)                                                     | 26.487(5)                                                                                                        |
| <i>b</i> (Å)                                                     | 28.262(6)                                                                                                        |
| <i>c</i> (Å)                                                     | 14.916(3)                                                                                                        |
| $\alpha$ (°)                                                     | 90.00                                                                                                            |
| $\beta$ (°)                                                      | 90.00                                                                                                            |
| $\sigma$ (°)                                                     | 90.00                                                                                                            |
| <i>V</i> (Å <sup>3</sup> )                                       | 11166(4)                                                                                                         |
| <i>Z</i>                                                         | 4                                                                                                                |
| Absorption coefficient (mm <sup>-1</sup> )                       | 0.158                                                                                                            |
| <i>F</i> (000)                                                   | 4104                                                                                                             |
| Crystal size (mm)                                                | 0.50 × 0.49 × 0.30                                                                                               |
| <i>D<sub>c</sub></i> (g cm <sup>-3</sup> )                       | 1.123                                                                                                            |
| $\theta$ Range for data                                          | 1.70 – 30.72                                                                                                     |
| Reflections collected                                            | 34132                                                                                                            |
| Unique reflections [ <i>R</i> (int)]                             | 27902 (0.0668)                                                                                                   |
| Data/restraints/parameters                                       | 27902 / 1 / 1082                                                                                                 |
| Goodness-of-fit on <i>F</i> <sup>2</sup>                         | 1.047                                                                                                            |
| Final <i>R</i> indices [ <i>I</i> > 2σ( <i>I</i> )] <sup>a</sup> | <i>R</i> <sub>1</sub> = 0.0689<br><i>wR</i> <sub>2</sub> = 0.1741                                                |
| <i>R</i> indices (all data)                                      | <i>R</i> <sub>1</sub> = 0.0881<br><i>wR</i> <sub>2</sub> = 0.1951                                                |

<sup>a</sup>  $R_1 = \frac{\sum ||F_o| - |F_c||}{\sum |F_o|}$ ,  $wR_2 = \frac{[\sum (w(F_o^2 - F_c^2)^2)]}{\sum w(F_o^2)^2}]^{1/2}$
